# Supplementary material
Source: publisher figshare collection journal article supplement (https://acs.figshare.com/ndownloader/files/20178917)
Supplement: Supplementary file 1 [file 20178917]

## **Supporting Information**

### **Synthesis and characterization of sintered Sr/Fe-modified hydroxyapatite bioceramics for bone tissue engineering applications**

Ismat Ullah<sup>1</sup>, Antonio Gloria<sup>2</sup>, Wancheng Zhang<sup>1</sup>, Muhammad Wajid Ullah<sup>3</sup>, Bin Wu<sup>1</sup>,  
Wenchao Li<sup>4</sup>, Marco Domingos<sup>5</sup>, Xianglin Zhang<sup>1\*</sup>

<sup>1</sup>State Key Laboratory of Materials Processing and Die/Mold Technology, School of Materials Science and Engineering, Huazhong University of Science and Technology, Wuhan 430074, P.R China

<sup>2</sup>Institute of Polymers, Composites and Biomaterials – National Research Council of Italy, V.le J.F. Kennedy 54 –Mostra d'Oltremare Pad. 20, 80125 Naples, Italy

<sup>3</sup>Department of Biomedical Engineering, Huazhong University of Science and Technology, Wuhan 430074, P.R China

<sup>4</sup>School of Mechatronics Engineering, Nanchang University, Nanchang 330031, PR China

<sup>5</sup>Department of Mechanical, Aerospace and Civil Engineering, School of Engineering, Faculty of Science and Engineering, The University of Manchester, UK

#### **\*Corresponding author**

Xianglin Zhang (Email: hust\_zxl@mail.hust.edu.cn)

Tel: +862787543676

Fax: +862787543776

1 **Table S1.** The concentration of different chemical reagents used in the preparation of various HAp bioceramics. ( $M^* = Ca + Sr + Fe$ ).

| Sample           | Molar concentrations              |                                                  |                                   |                   | $M^*/P$ | Sr/ $M^*$<br>(%) | Fe/ $M^*$<br>(%) |
|------------------|-----------------------------------|--------------------------------------------------|-----------------------------------|-------------------|---------|------------------|------------------|
|                  | Ca(NO <sub>3</sub> ) <sub>2</sub> | (NH <sub>4</sub> ) <sub>2</sub> HPO <sub>4</sub> | Sr(NO <sub>3</sub> ) <sub>2</sub> | FeCl <sub>3</sub> |         |                  |                  |
| HAp              | 1.00                              | 0.60                                             | -                                 | -                 | 1.667   | -                | -                |
| Sr10: HAp        | 0.90                              | 0.60                                             | 0.10                              | -                 | 1.667   | 19.55            | -                |
| Sr7.5/Fe2.5: HAp | 0.90                              | 0.60                                             | 0.075                             | 0.025             | 1.667   | 14.91            | 3.17             |
| Sr5/Fe5: HAp     | 0.90                              | 0.60                                             | 0.05                              | 0.05              | 1.667   | 10.13            | 6.45             |
| Sr2.5/Fe7.5: HAp | 0.90                              | 0.60                                             | 0.025                             | 0.075             | 1.667   | 5.15             | 9.87             |
| Fe10: HAp        | 0.90                              | 0.60                                             | -                                 | 0.10              | 1.667   | -                | 13.41            |

2

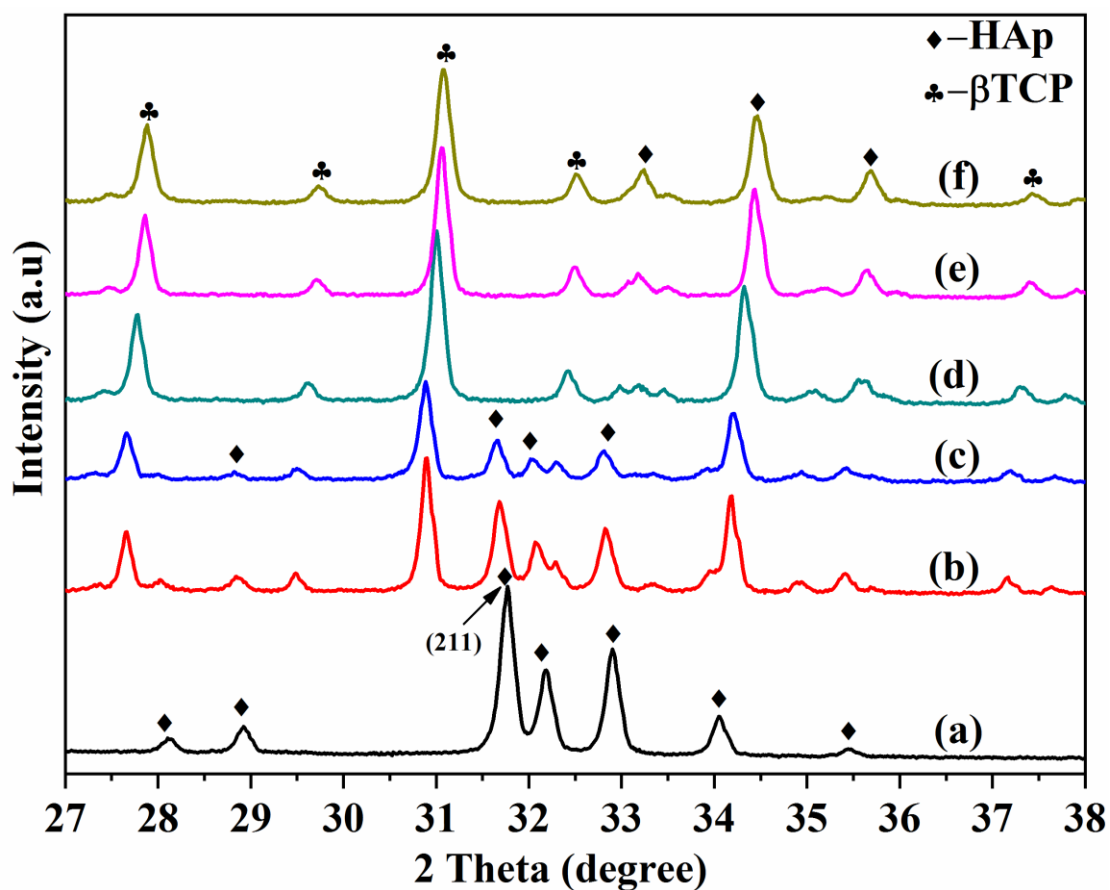

**Figure S1.** XRD peak pattern of various HAp bioceramics. (a) pristine HAp, (b) Sr10:HAp, (c) Sr7.5/Fe2.5:HAp, (d) Sr5/Fe5:HAp, (e) Sr2.5/Fe7.5:HAp, and (f) Fe10:HAp

The peaks shift, peaks broadening and variation in intensity of peak at (211) plan, indicating the substitution effect in HAp lattice.

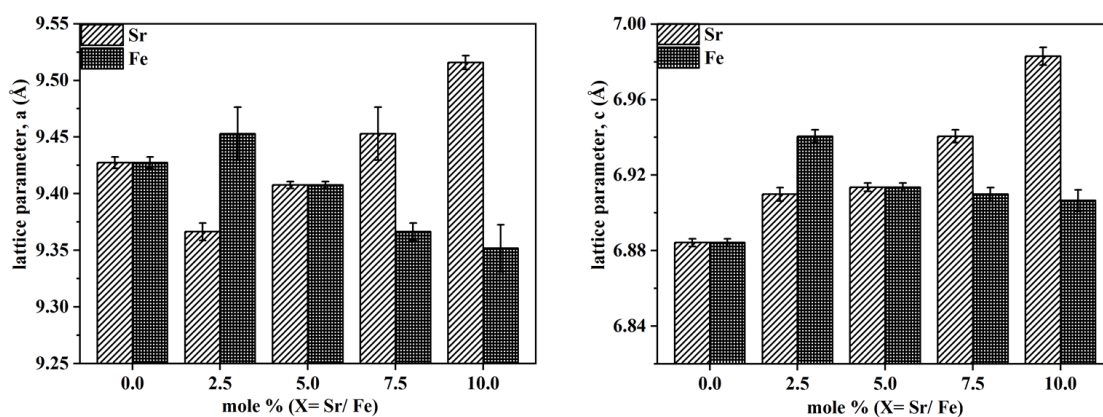

**Figure S2.** Dependency of the lattice parameters (a and c) on mole % (X= Sr or Fe).

The lattice parameters along both a- and c-axis tend to increase with the rise of

Sr content and *vice versa* for Fe ion concentration in the host lattice.

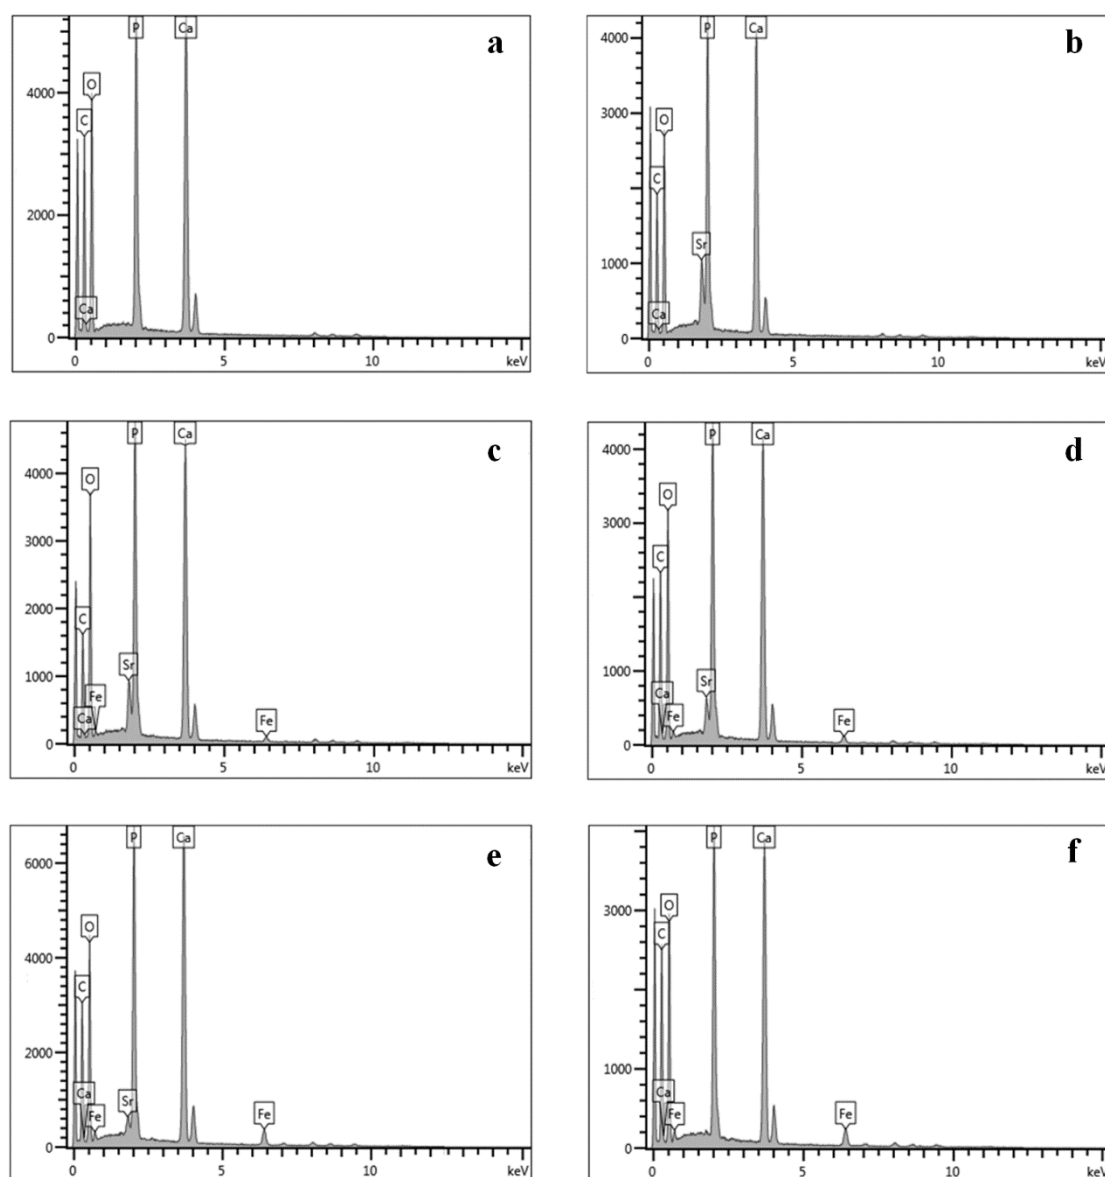

**Figure S3.** EDX spectra for various HAp bioceramics under investigation, (a) pristine HAp, (b) Sr10:HAp, (c) Sr7.5/Fe2.5:HAp, (d) Sr5/Fe5:HAp, (e) Sr2.5/Fe7.5:HAp, and (f) Fe10:HAp.

The EDX spectra for investigated HAp bioceramics, for example, Sr5/Fe5:HAp group specified that concentration of Sr and Fe was about 2.10 mole% and 1.42 mole% respectively, representing each substituent (i.e. Sr or Fe) exchange ratio with Ca was smaller with respect to the theoretical value of 5 mole%.

**Table S2.** Elemental composition obtained from the EDX spectra for investigated HAp bioceramics.

| <b>Sample</b>    | <b>Ca</b> | <b>Sr</b> | <b>Fe</b> | <b>P</b> | <b>Ca/ P</b> |
|------------------|-----------|-----------|-----------|----------|--------------|
| HAp              | 17.20     | 0.00      | 0.00      | 10.2     | 1.69         |
| Sr10: HAp        | 17.35     | 4.26      | 0.00      | 11.21    | 1.55         |
| Sr7.5/Fe2.5: HAp | 17.52     | 3.59      | 0.93      | 11.91    | 1.47         |
| Sr5/Fe5: HAp     | 16.18     | 2.10      | 1.42      | 10.53    | 1.54         |
| Sr2.5/Fe7.5:HAp  | 17.69     | 1.25      | 3.10      | 11.28    | 1.57         |
| Fe10:HAp         | 15.99     | 0.00      | 3.19      | 10.42    | 1.58         |

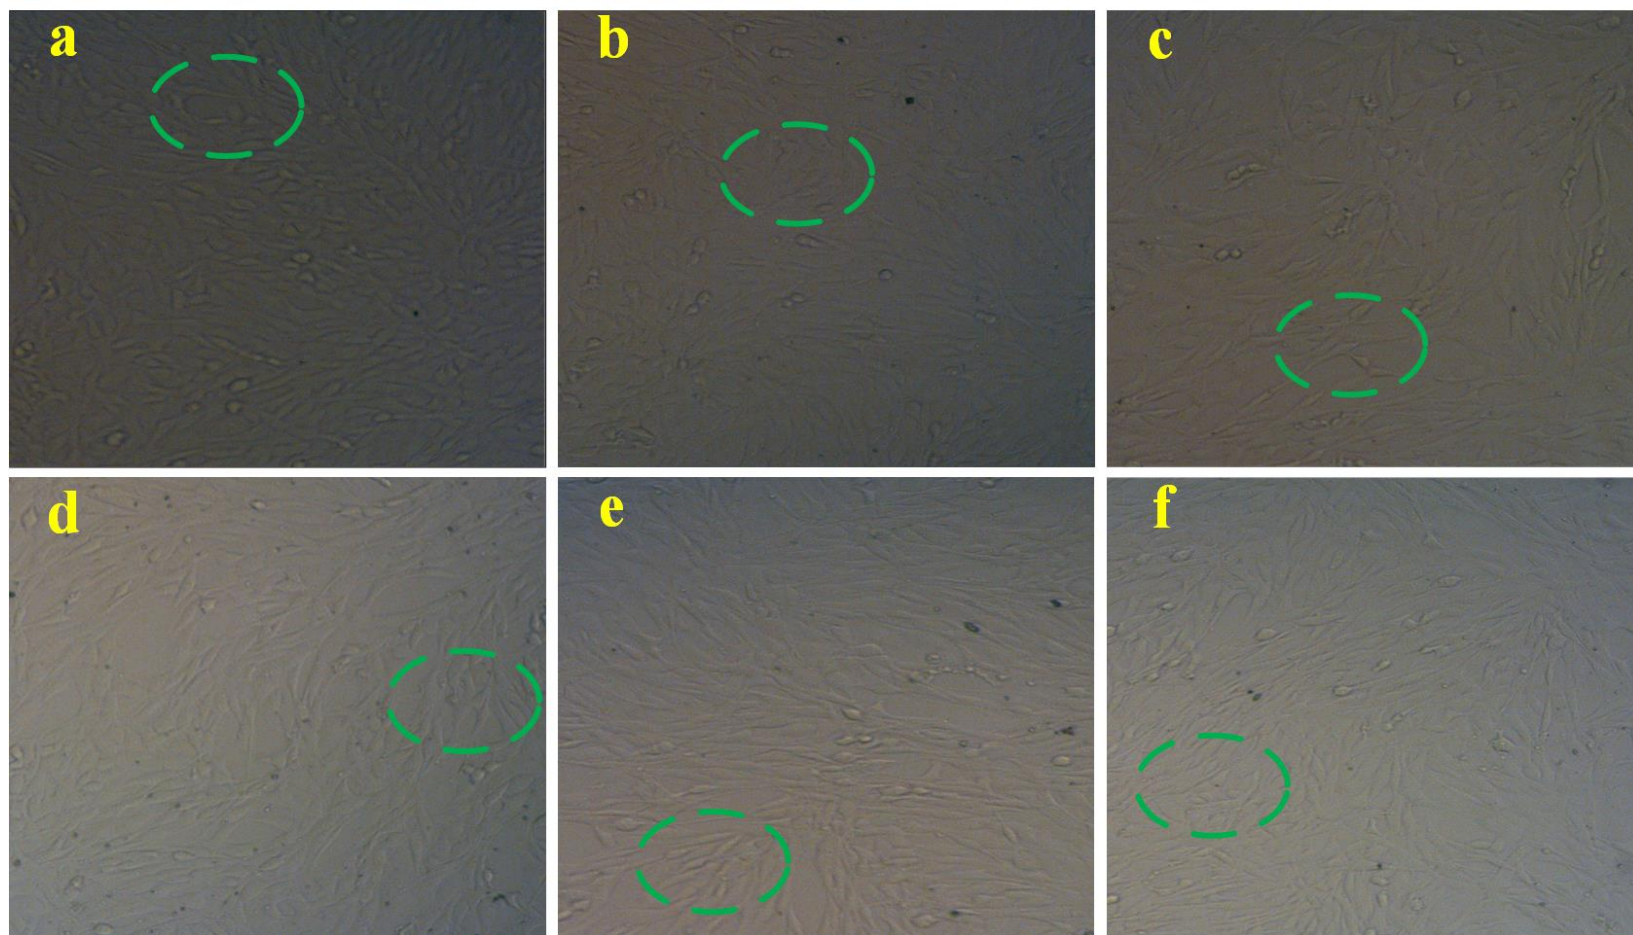

**Figure S4.** The phase contrast microscopy images (scale bar 50  $\mu\text{m}$ ) of cultured hMSCs on investigated HAp bioceramics at day 3, (a) pristine HAp, (b) Sr10:HAp, (c) Sr7.5/Fe2.5:HAp, (d) Sr5/Fe5:HAp, (e) Sr2.5/Fe7.5:HAp, and (f) Fe10:HAp, groups respectively.
